# Supplementary material for: Synergistic Effects of Sanglifehrin-Based Cyclophilin Inhibitor NV651 with Cisplatin in Hepatocellular Carcinoma
Source: MDPI journal article supplement (doi:10.3390/cancers14194553), 2022-09-20
Supplement: s1 [file s1]

**Table S1.** AUC, tissue of origin and availability of transcriptomics data for 50 cell lines.

| Cell Line | Tissue     | HBV | Transcriptome Availability | NV651 IC50 (nM) | NV651 AUCs | NV651 Sensitivity |
|-----------|------------|-----|----------------------------|-----------------|------------|-------------------|
| BXPC3     | Pancreas   |     | yes                        | 59.99           | 1.98       | Insensitive       |
| NOZ       | Liver      | -   | yes                        | 51.84           | 2.10       | Insensitive       |
| SW1990    | Pancreas   |     | yes                        | 34.41           | 2.26       | Insensitive       |
| HCT116    | Colorectum |     | yes                        | 71.80           | 2.36       | Insensitive       |
| RKO       | Colorectum |     | yes                        | 79.79           | 2.55       | Insensitive       |
| OZ        | Liver      | -   | yes                        | 83.79           | 2.55       | Insensitive       |
| CAPAN1    | Pancreas   |     | yes                        | 157.49          | 2.55       | Insensitive       |
| HT29      | Colorectum |     | yes                        | 101.19          | 2.58       | Insensitive       |
| LOVO      | Colorectum |     | yes                        | 163.75          | 2.59       | Insensitive       |
| HUCCT1    | Liver      | -   | yes                        | 194.01          | 2.59       | Insensitive       |
| SNU739    | Liver      | +   | yes                        | 349.94          | 2.72       | Insensitive       |
| JHH4      | Liver      | -   | yes                        | 485.64          | 2.77       | Insensitive       |
| SW480     | Colorectum |     | yes                        | 164.66          | 2.79       | Insensitive       |
| MIAPACA2  | Pancreas   |     | yes                        | 210.22          | 2.82       | Insensitive       |
| HEPG2     | Liver      | -   | yes                        | 437.43          | 2.86       | Insensitive       |
| SKHEP1    | Liver      | -   | yes                        | 1266.92         | 2.88       | Intermediate      |
| JHH7      | Liver      | +   | yes                        | 595.20          | 2.93       | Intermediate      |
| DLD1      | Colorectum |     | no                         | 657.24          | 2.93       | Intermediate      |
| T84       | Colorectum |     | yes                        | 478.95          | 3.00       | Intermediate      |
| CFPAC1    | Pancreas   |     | yes                        | 1334.05         | 3.03       | Intermediate      |
| JHH6      | Liver      | -   | yes                        | 3252.59         | 3.07       | Intermediate      |
| HUH6      | Liver      | -   | yes                        | NA              | 3.08       | Intermediate      |
| PLC/PRF/5 | Liver      | +   | yes                        | NA              | 3.13       | Intermediate      |
| OCUG1     | Liver      | -   | yes                        | NA              | 3.13       | Intermediate      |
| HLE       | Liver      | -   | yes                        | 2932.07         | 3.13       | Intermediate      |
| SNU398    | Liver      | +   | yes                        | NA              | 3.16       | Intermediate      |
| SNU475    | Liver      | +   | yes                        | NA              | 3.22       | Intermediate      |
| LS411N    | Colorectum |     | yes                        | NA              | 3.22       | Intermediate      |
| HCT8      | Colorectum |     | no                         | 1971.11         | 3.27       | Intermediate      |
| KP4       | Pancreas   |     | yes                        | NA              | 3.28       | Intermediate      |
| PL45      | Pancreas   |     | no                         | NA              | 3.28       | Intermediate      |
| HUH7      | Liver      | -   | yes                        | NA              | 3.29       | Intermediate      |
| HLF       | Liver      | -   | yes                        | 1379.77         | 3.29       | Intermediate      |
| HCT15     | Colorectum |     | yes                        | 2159.44         | 3.33       | Intermediate      |
| PANC1     | Pancreas   |     | yes                        | NA              | 3.34       | Intermediate      |
| HCCLM3    | Liver      | +   | yes                        | NA              | 3.37       | Intermediate      |
| HCCC9810  | Liver      | -   | yes                        | NA              | 3.37       | Intermediate      |
| LI7       | Liver      | -   | yes                        | 3599.92         | 3.39       | Sensitive         |
| SNU387    | Liver      | +   | yes                        | NA              | 3.51       | Sensitive         |
| SNU423    | Liver      | +   | yes                        | NA              | 3.52       | Sensitive         |
| HUH1      | Liver      | -   | yes                        | 285920.55       | 3.52       | Sensitive         |
| MHCC97H   | Liver      | +   | yes                        | NA              | 3.55       | Sensitive         |
| ASPC1     | Pancreas   |     | yes                        | 19507.22        | 3.69       | Sensitive         |
| SNU354    | Liver      | +   | yes                        | 135657.60       | 3.70       | Sensitive         |
| SNU761    | Liver      | +   | yes                        | NA              | 3.82       | Sensitive         |
| JHH5      | Liver      | -   | yes                        | 10235.99        | 3.87       | Sensitive         |
| SNU368    | Liver      | +   | yes                        | NA              | 3.91       | Sensitive         |

|          |       |   |     |          |      |           |
|----------|-------|---|-----|----------|------|-----------|
| JHH1     | Liver | - | yes | 30722.03 | 4.04 | Sensitive |
| SNU449   | Liver | + | yes | 31827.04 | 4.09 | Sensitive |
| HEP3B217 | Liver | + | yes | NA       | 4.17 | Sensitive |

\*Cell lines are arranged in ascending order in relation to Area Under the curve (AUC). HBV DNA detected and/or hepatitis B surface antigen (HBsAg) expression in liver derived-cell lines are indicated as HBV positive. The AUCs were normalized using z-score method: z-score > 0.5 (insensitive) and z-score < -0.5 (sensitive), which corresponds to the original AUC values of 3.39 and 2.86.

**Table S2.** Primers for quantitative PCR for human.

|                  |                           |
|------------------|---------------------------|
| BRIP1-F qPCR     | TGTCTGTTGATATTCTGAGTCGAT  |
| BRIP1-R qPCR     | CCCTAAATGTAAATGAGTAAGAGCC |
| FANCA-F qPCR     | CAGAACCCAACTCTGCTGAGGA    |
| FANCA-R qPCR     | ATCACTGCCACCTGTGCCGATA    |
| FANCB-F qPCR     | GGACTCCTTGAACCTCAGACTGC   |
| FANCB-R qPCR     | AGAGGTGGAACCACCAGGTAAC    |
| FANCL-F qPCR     | GGAGTGCAACAGCACGCAGAAT    |
| FANCL-R qPCR     | CTGCTCAGCTTAATTCCCAGGG    |
| REV1-F qPCR      | GAAATCCACCGAAGAGGAGCAC    |
| REV1-R qPCR      | ATCAGGACTGGTCGGCAGATGT    |
| POLA2-F qPCR     | TTCGTGAAGGATGTCCTCGG      |
| POLA2-R qPCR     | TGACGACCTGCACAGCAAT       |
| PRIM1-F qPCR     | ACTGTTTTCCACGGCTGGAT      |
| PRIM1-R qPCR     | AATGGCATCCAATTCACGGC      |
| RFC3-F qPCR      | CCTGAGACAGATTGGGAGGTGT    |
| RFC3-R qPCR      | AGCTCATACAGCCTTCCACGAAC   |
| RFC4-F qPCR      | GGCAGCTTTAAGACGTACCATGG   |
| RFC4-R qPCR      | TCTGACAGAGGCTTGAAGCGGA    |
| ATM-F qPCR       | TGCGTGGCTAACGGAGAAAA      |
| ATM-R qPCR       | CACTGTCACTGCACTCGGAA      |
| E2F3-F qPCR      | AGCGGTCATCAGTACCTCTCAG    |
| E2F3-R qPCR      | TGGTGAGCAGACCAAGAGACGT    |
| SMAD2-F q        | GGGTTTTGAAGCCGTCTATCAGC   |
| SMAD2-R          | CCAACCACTGTAGAGGTCCATTC   |
| GADD45A-F        | AATTCTCGGCTGGAGAGCAG      |
| GADD45A-R        | TACACCCCGACAGTGATCGT      |
| ORC2-F           | GAGGAGAGAAGAGCCAGCAAATC   |
| ORC2-R           | GACTCTGCTTTGCATGATCCAC    |
| ORC6-F           | GAGAAGATTGGACAGCAGGTCTG   |
| ORC6-R           | GGTTTATGTGGCATCTCCTCTAC   |
| BRCA1-F          | CTGAAGACTGCTCAGGGCTATC    |
| BRCA1-R          | AGGGTAGCTGTTAGAAGGCTGG    |
| DNA2-F           | GATTTCTGGCACCAGCATAGCC    |
| DNA2-R           | ACACCTCATGGAGAACCGTACC    |
| GAPDH-F          | TGCACCACCAACTGCTTAGC      |
| GAPDH-R          | GGCATGGACTGTGGTCATGAG     |
| PPIA-F           | CTCGAATAAGTTTGACTTGTGTTT  |
| PPIA-R           | CTAGGCATGGGAGGGAACA       |
| PPIB-F           | GCATGAAGGTGCCCCCTCTTCGCC  |
| PPIB-R           | GCCTCCTTGGAATGGCAAAGG     |
| PPIL3-F          | AAGACTGAGAAATCACGTAGTCC   |
| PPIL3-R          | CAAGCAGAAGGATGATGCAATC    |
| $\beta$ -actin-F | CACCATTGGCAATGAGCGGTTC    |
| $\beta$ -actin-R | AGGTCTTTGCGGATGTCCACGT    |

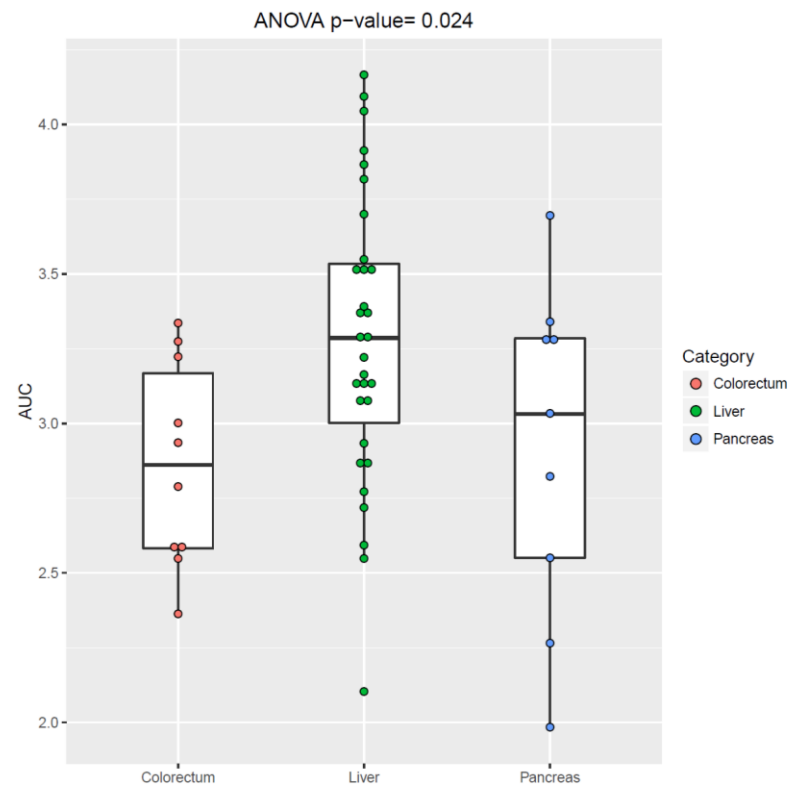

**Figure S1.** Boxplot indicating average NV651 AUC and statistical analysis between different tumor types.

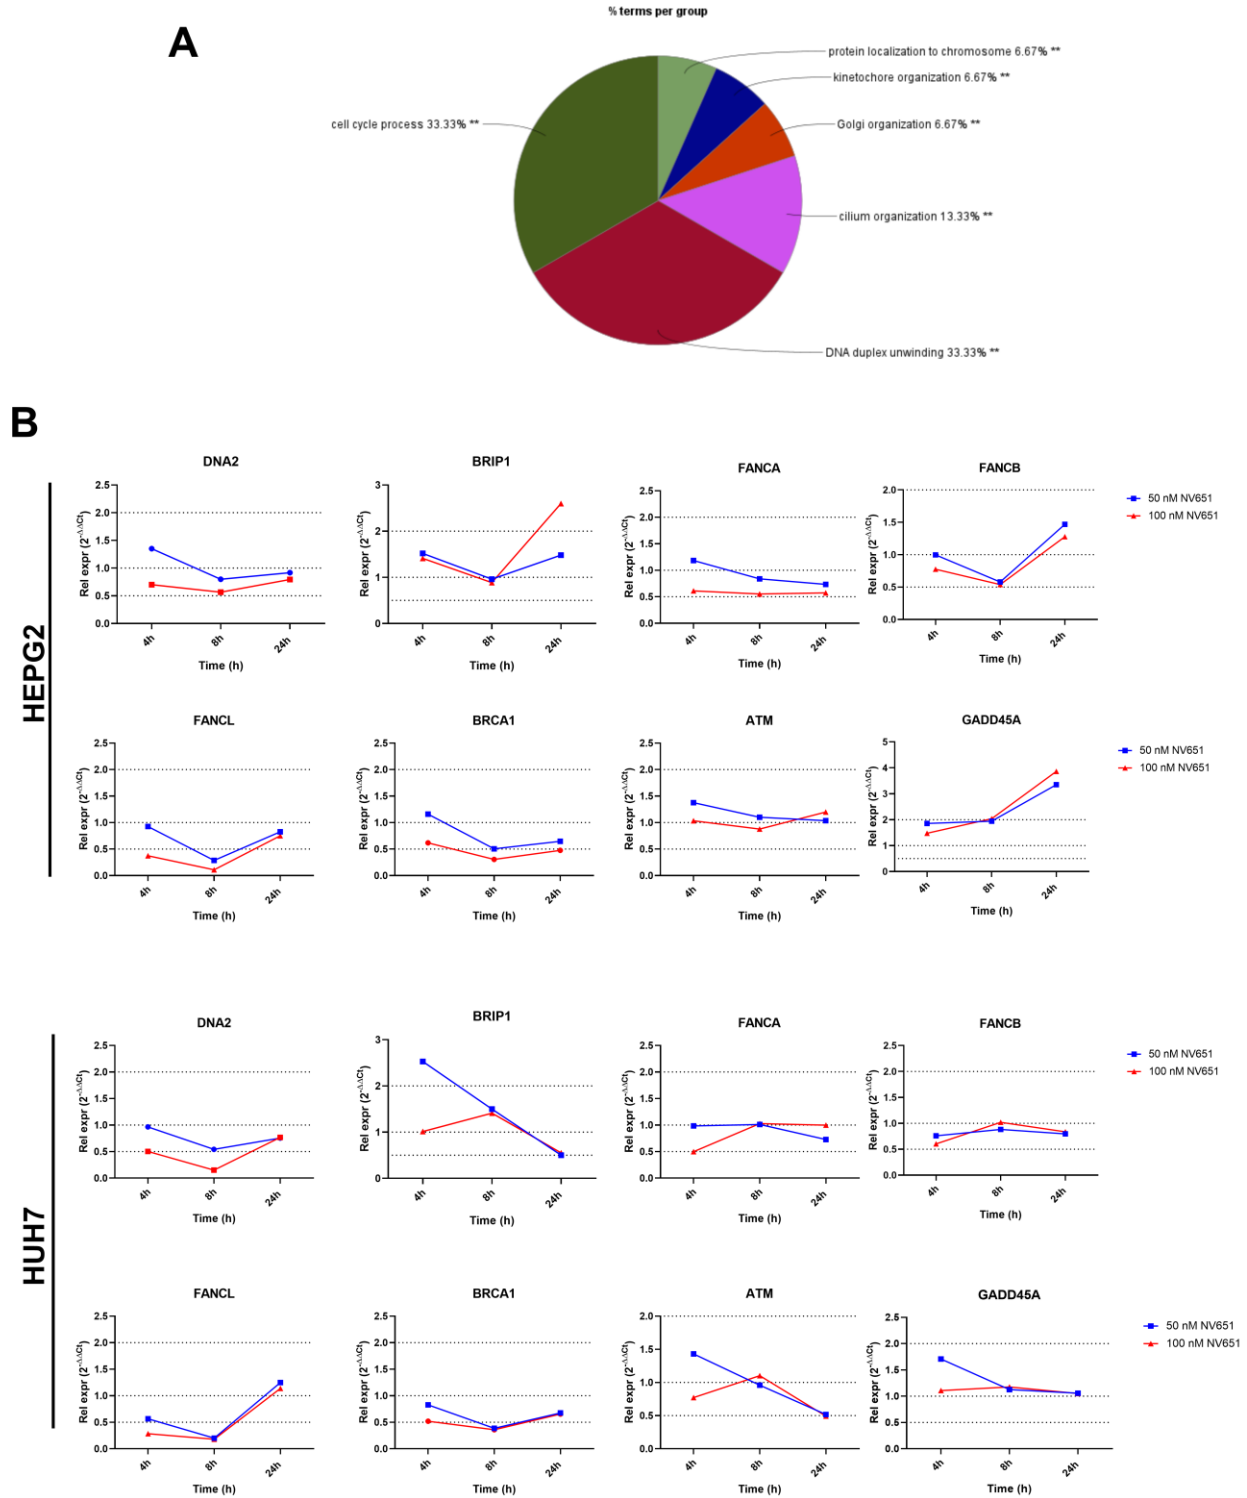

**Figure S2.** NV651 effect on gene expression in HCC cell lines. (A) Overlapped gene sets of GO-BP with a p-value lower than 0.05 were observed with ClueGO between NV651 versus control and NV651 vs CsA. (B) NV651 effect on expression in genes involved in DNA repair and cell cycle. HEPG2 and HUH7 cells were treated with 0, 50 or 100 nM of NV651 for 4, 8 and 72 hours. mRNA levels for each gene were evaluated by qPCR.

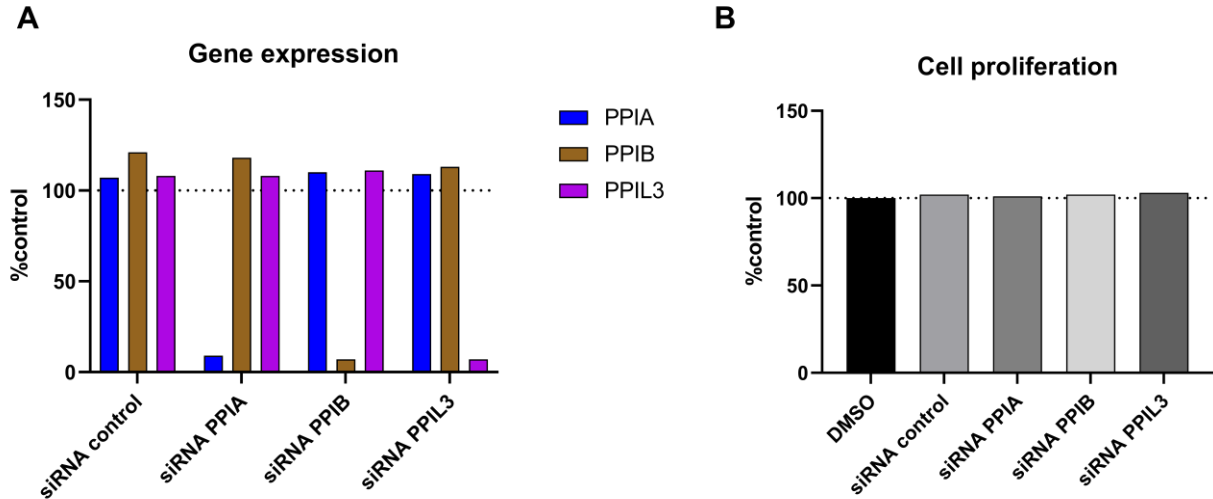

**Figure S3.** Gene silencing effect on cell proliferation (A) mRNA levels (% DMSO control) of PPIA, PPIB and PPIL-3 and normalized with  $\beta$ -actin. qPCR was performed after 24 hours of siRNA addition. (B) Cell proliferation was evaluated by total cell number count and calculated in relation to the DMSO control (% control).

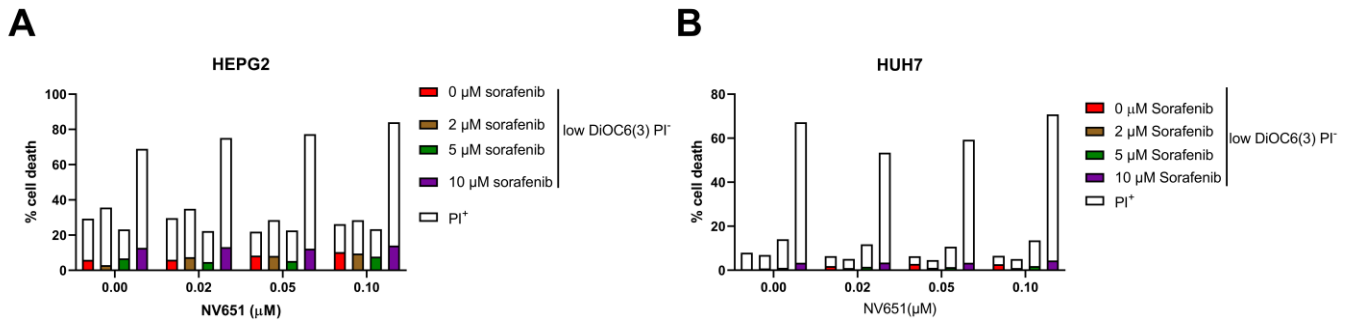

**Figure S4.** Sorafenib and NV651 effect on cell death. NV651 effect on the mitochondrial membrane potential (pre-apoptotic marker) and PI<sup>+</sup> cells (late apoptotic + necrotic marker) after 72 h of exposure to the combination treatment. Quantification of PI<sup>+</sup> cells and PI<sup>-</sup> low DiOC(6)3, equivalent to the low mitochondrial membrane potential in HEPG2 (A) and HUH7 (B).

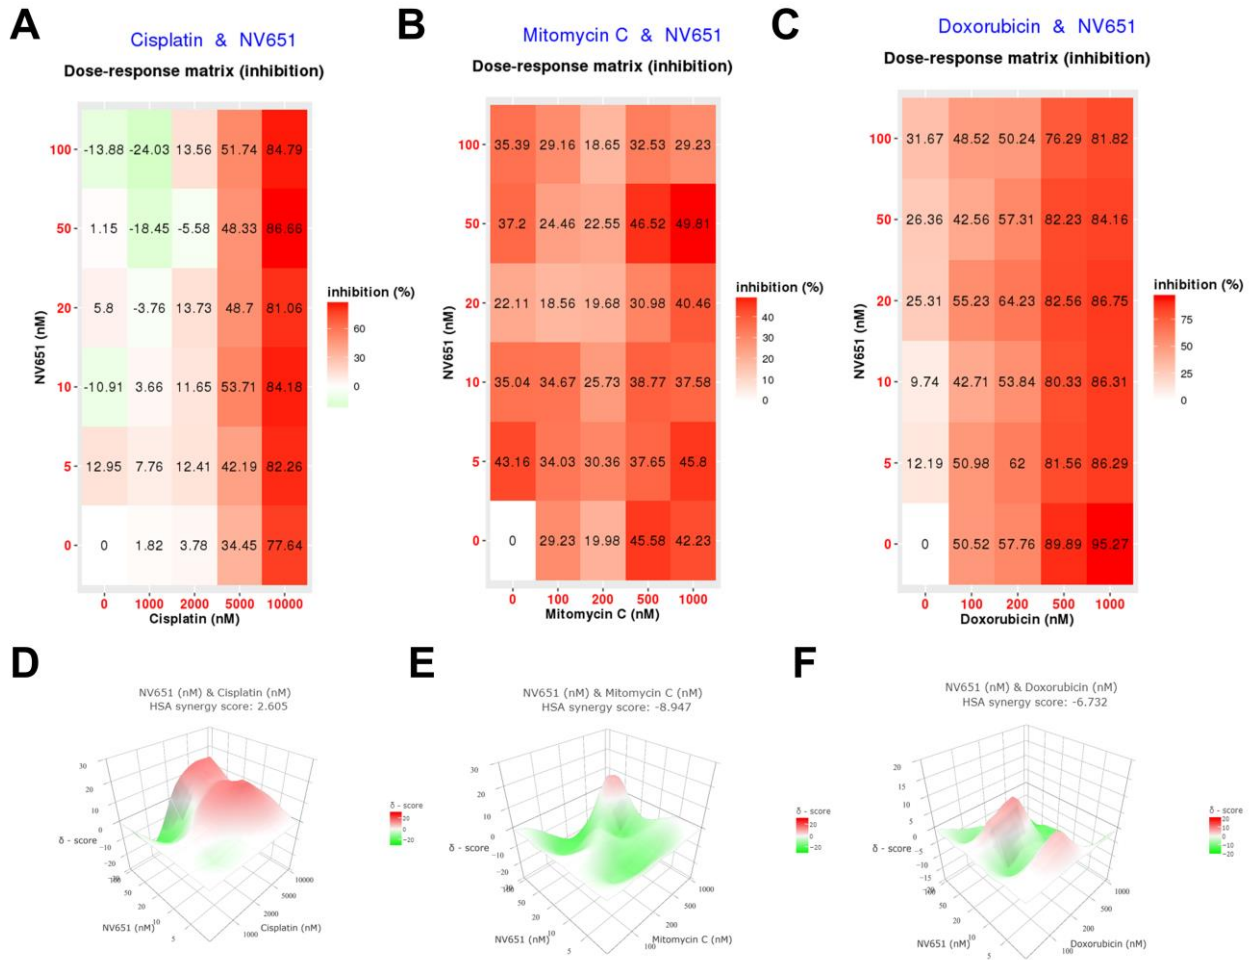

**Figure S5.** Synergistic effect with NV651 and HCC treatments in HUH7 cells. Effect on cell proliferation in HUH7 after 72 hours of exposure to the combination treatment between NV651 and cisplatin (A), Mitomycin (B) or Doxorubicin (C). Data in A-C are presented as % inhibition. D-F Synergy score calculated with highest single agent (HSA) from each data presented in A-C. n=1 biological replicate .

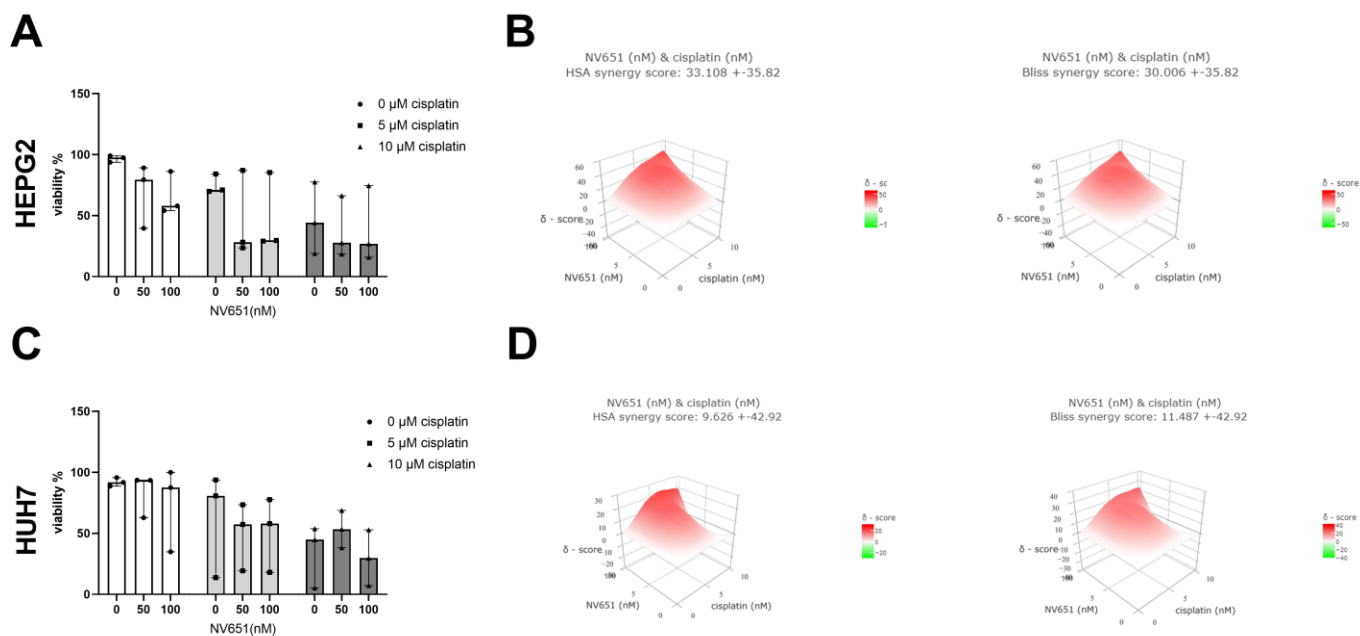

**Figure S6.** Effect on cell viability after 72 hours of treatment in HEPG2 (A) and HUH7 (C). Data are presented as median $\pm$ 95% CI of the percentage of viable cells negative for trypan blue. (B and D) Synergy score calculated with highest single agent (HSA) and Bliss from data presented in A and C. n=3 biological replicates.

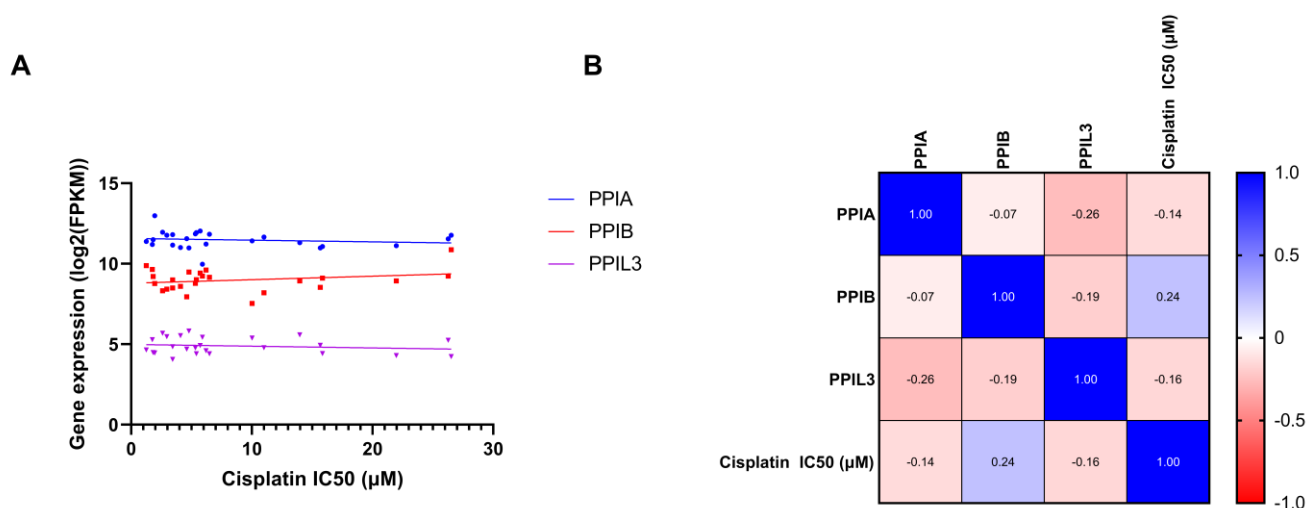

**Figure S7.** Correlation between cisplatin sensitivity and Gene expression of PPIA, PPIB and PPIL3 from Xenobase (Crownbio) (A) Median IC50 of cisplatin and gene expression of PPIA, PPIB and PPIL3 of available cancer cell lines originated from the liver are represented by each data point. (B) Pearson  $r$ / correlation coefficient between cyclophilin expression and cisplatin sensitivity indicated by IC50. Colour range indicates the R value .
